# Supplementary material for: Electrochemical studies of a high voltage Na4Co3(PO4)2P2O7–MWCNT composite through a selected stable electrolyte
Source: Royal Society of Chemistry journal article supplement (doi:10.1039/d0ra02349c), 2020-01-01
Supplement: d0ra02349c1.pdf [file d0ra02349c1.pdf]

*Electronic Supplementary Information*

## **Electrochemical studies of high voltage $\text{Na}_4\text{Co}_3(\text{PO}_4)_2\text{P}_2\text{O}_7$ -MWCNT composite through selected stable electrolyte**

P. Ramesh Kumar<sup>a</sup>, R. Essehli<sup>b</sup>, H. B. Yahia<sup>a</sup>, R. Amin<sup>b\*</sup>, I. Belharouak<sup>b</sup>

<sup>a</sup> *Qatar Environment and Energy Research Institute (QEERI), Hamad Bin Khalifa University, Qatar Foundation, 34110, Doha, Qatar.*

<sup>b</sup> *Energy and Transportation Science Division, Oak Ridge National Laboratory, Oak Ridge, TN, USA.*



**Figure S1.** Thermal gravimetric analysis curve for the  $\text{Na}_4\text{Co}_3(\text{PO}_4)_2\text{P}_2\text{O}_7$ -MWCNT composite.



Figure S2. Raman spectra for the  $\text{Na}_4\text{Co}_3(\text{PO}_4)_2\text{P}_2\text{O}_7\text{-MWCNT}$  composite.



**Figure S3.** First charging curve for the  $\text{Na}_4\text{Co}_3(\text{PO}_4)_2\text{P}_2\text{O}_7$ -MWCNT composite in 1M  $\text{NaClO}_4$  in PC+ 5% FEC electrolyte.



**Figure S4.** a) Cycleability results and b) Charge –discharge curves for the  $\text{Na}_4\text{Co}_3(\text{PO}_4)_2\text{P}_2\text{O}_7\text{-MWCNT}$  composite at  $55^\circ\text{C}$ .



**Figure S5.**  
 Rate  
 capability  
 results from  
 1 C to 20 C

for the  $\text{Na}_4\text{Co}_3(\text{PO}_4)_2\text{P}_2\text{O}_7\text{-MWCNT}$  composite at  $55^\circ\text{C}$ .



**Figure S6.** Rate capability results from 1 C to 20 C for the  $\text{Na}_4\text{Co}_3(\text{PO}_4)_2\text{P}_2\text{O}_7\text{-MWCNT}$  composite at room temperature.



Figure S7: Equivalent electrical circuit model for fitting impedance data.



**Figure S8.** Electrochemical Impedance spectra for the  $\text{Na}_4\text{Co}_3(\text{PO}_4)_2\text{P}_2\text{O}_7$ -MWCNT composite electrode during the a) charging and b) discharging states at 55 °C.
